# Supplementary material for: Co-design, implementation, and evaluation of plain language genomic test reports
Source: PubMed Central journal article supplement (PMC9588009; doi:10.1038/s41525-022-00332-x), 2022-10-22
Supplement: 41525_2022_332_MOESM1_ESM.pdf [file 41525_2022_332_MOESM1_ESM.pdf]

## Supplementary Notes 1. Plain language genomic test report templates

Brett GR, Ward A, Bouffler SE, Palmer EE, Boggs K, Lynch F, Springer A, Nisselle A, Stark Z.  
*Co-design, implementation, and evaluation of plain language genomic test reports.*  
npj Genomic Medicine 2022

Plain language genomic test report templates developed in the above study are enclosed in the following order:

- page 2: *de novo* dominant
- page 3: inherited autosomal dominant
- page 4: autosomal recessive
- page 5: X-linked inherited
- page 6: X-linked *de novo*
- page 7: mitochondrial
- page 8: variant(s) of unknown significance with high clinical relevance (i.e., strongly suspected to be causing the phenotype)
- page 9: uninformative result (i.e., no variants reported)

These plain language genomic test report templates were designed in Microsoft Word using Microsoft Forms fields. Use of these fields enables sections to be locked against changes to the template, while still enabling personalisation of relevant content.

When the document was 'unlocked', the templates were fully modifiable, allowing form fields to be added, edited or deleted.

When the document was 'protected' (enabled in the 'Developer' tab in Microsoft Word), the template content was 'locked' so only the fields in grey could be modified, along with the final sections of '*What happens next*', '*Your genetic team*', and '*Community supports*'.

Parents' names Parents' names

Study ID: A [redacted] Testing Laboratory: [redacted]  
 Sample IDs: Patient – 22W [redacted], Mum – 22W [redacted], Dad – 22W [redacted]

Reason for test Unexplained seizures in Patient

About the test We performed a 'trio whole genome sequencing' (trio WGS) test. This test examines your and Patient's genetic information to try and find a cause for Patient's condition. You can find links to more information about this test at the bottom of this document.

Patient's result **KCNQ2-related epileptic encephalopathy**

Gene: *KCNQ2*  
 Variant: NM\_000000: c.000C>G, p.Arg000Cys

Inheritance and recurrence **Inheritance pattern:** Patient has not inherited the *KCNQ2* gene variant, it has occurred in him/her for the first time (it is *de novo*).

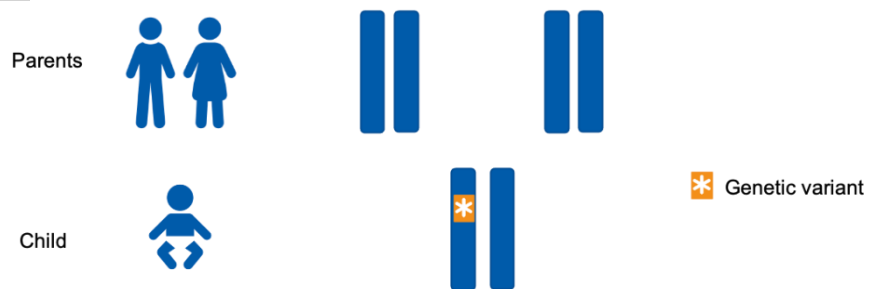

**Recurrence:** Parents' names, you have a low chance of recurrence in future pregnancies for this condition. You have options for testing to avoid a recurrence and can discuss these in more detail with your genetics team.

What happens next **Clinical recommendations:** You will be advised by the Neurology team whether any changes to Patient's seizure medication are necessary.

**Data storage and re-analysis:** Your and Patient's genomic data will be stored securely and can be re-analysed in the future if new clinical questions arise.

Your genetic team We will work together with the other medical teams involved in Patient's care.

Clinical geneticist:  
 Genetic counsellor:  
 Genetics follow up:

Community supports Further resources and community support networks:

- Genomics Info - [genomicsinfo.org.au](http://genomicsinfo.org.au)
- SWAN Australia - [swanaus.org.au](http://swanaus.org.au)
- Genetic Alliance Australia - [geneticalliance.org.au](http://geneticalliance.org.au)
- MedlinePlus Genetics - [medlineplus.gov/genetics](http://medlineplus.gov/genetics)

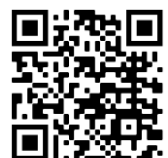

Scan the QR code for more information on genomics

|                                   |                                                                                                                                                                                                                                                                                                                                                                                                                                                                                                                                                                                                                                                                                                                                                                                                                                                                                                                                                                                                                                                                                                                                                                                                                                                                                                                                                                                                                             |
|-----------------------------------|-----------------------------------------------------------------------------------------------------------------------------------------------------------------------------------------------------------------------------------------------------------------------------------------------------------------------------------------------------------------------------------------------------------------------------------------------------------------------------------------------------------------------------------------------------------------------------------------------------------------------------------------------------------------------------------------------------------------------------------------------------------------------------------------------------------------------------------------------------------------------------------------------------------------------------------------------------------------------------------------------------------------------------------------------------------------------------------------------------------------------------------------------------------------------------------------------------------------------------------------------------------------------------------------------------------------------------------------------------------------------------------------------------------------------------|
| <p>Parents' names</p>             | <p>Parents' names</p> <p>Study ID: A [redacted] Testing Laboratory: [redacted]</p> <p>Sample IDs: Patient – 22W [redacted], Mum – 22W [redacted], Dad – 22W [redacted]</p>                                                                                                                                                                                                                                                                                                                                                                                                                                                                                                                                                                                                                                                                                                                                                                                                                                                                                                                                                                                                                                                                                                                                                                                                                                                  |
| <p>Reason for test</p>            | <p>Unexplained cardiac arrest</p>                                                                                                                                                                                                                                                                                                                                                                                                                                                                                                                                                                                                                                                                                                                                                                                                                                                                                                                                                                                                                                                                                                                                                                                                                                                                                                                                                                                           |
| <p>About the test</p>             | <p>We performed a 'trio whole genome sequencing' (trio WGS) test. This test examines your and Patient's genetic information to try and find a cause for Patient's condition. You can find links to more information about this test at the bottom of this document.</p>                                                                                                                                                                                                                                                                                                                                                                                                                                                                                                                                                                                                                                                                                                                                                                                                                                                                                                                                                                                                                                                                                                                                                     |
| <p>Patient's result</p>           | <p>Long QT syndrome</p> <p>Gene: <i>SCN5A</i></p> <p>Variant: NM_000000: c.000C&gt;G, p.Arg000Cys</p>                                                                                                                                                                                                                                                                                                                                                                                                                                                                                                                                                                                                                                                                                                                                                                                                                                                                                                                                                                                                                                                                                                                                                                                                                                                                                                                       |
| <p>Inheritance and recurrence</p> | <p><b>Inheritance pattern:</b> The <i>SCN5A</i> gene variant in Patient has been inherited from mum/dad.</p> <p><b>Recurrence:</b> Parents' names, you have a 1 in 2, or 50%, chance of recurrence in each future pregnancy for the two of you. You have options for testing to avoid a recurrence and can discuss these in more detail with your genetics team. mum/dad, other members of your family are also at risk of Long QT syndrome.</p> 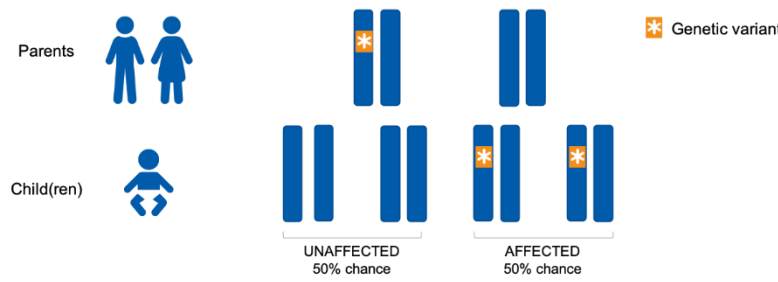 <p>The diagram illustrates the inheritance of a genetic variant. It shows two parents (mum and dad) at the top, each represented by a blue stick figure. Below them are two columns of vertical bars representing chromosomes. The left column is labeled 'UNAFFECTED 50% chance' and the right column is labeled 'AFFECTED 50% chance'. A legend indicates that an orange asterisk symbol represents a 'Genetic variant'. In the 'UNAFFECTED' column, the top bar has an orange asterisk, while the bottom bar does not. In the 'AFFECTED' column, both the top and bottom bars have orange asterisks. Below the bars, a blue stick figure represents the 'Child(ren)'. The diagram shows that the child has a 50% chance of inheriting the variant from both parents (becoming affected) and a 50% chance of inheriting the variant from only one parent (becoming unaffected).</p> |
| <p>What happens next</p>          | <p><b>Clinical recommendations:</b> The Cardiology team will discuss management options with you. mum/dad, we will refer you to a cardiology specialist and we will discuss recommendations for testing other family members further.</p> <p><b>Data storage and re-analysis:</b> Your and Patient's genomic data will be stored securely and can be re-analysed in the future if new clinical questions arise.</p>                                                                                                                                                                                                                                                                                                                                                                                                                                                                                                                                                                                                                                                                                                                                                                                                                                                                                                                                                                                                         |
| <p>Your genetic team</p>          | <p>We will work together with the other medical teams involved in Patient's care.</p> <p>Clinical geneticist:</p> <p>Genetic counsellor:</p> <p>Genetics follow up:</p>                                                                                                                                                                                                                                                                                                                                                                                                                                                                                                                                                                                                                                                                                                                                                                                                                                                                                                                                                                                                                                                                                                                                                                                                                                                     |
| <p>Community supports</p>         | <p>Further resources and community support networks:</p> <ul style="list-style-type: none"> <li>• Genomics Info - <a href="http://genomicsinfo.org.au">genomicsinfo.org.au</a></li> <li>• SWAN Australia - <a href="http://swanaus.org.au">swanaus.org.au</a></li> <li>• Genetic Alliance Australia - <a href="http://geneticalliance.org.au">geneticalliance.org.au</a></li> <li>• MedlinePlus Genetics - <a href="http://medlineplus.gov/genetics">medlineplus.gov/genetics</a></li> </ul>  <p>Scan the QR code for more information on genomics</p>                                                                                                                                                                                                                                                                                                                                                                                                                                                                                                                                                                                                                                                                                                                                                                                 |

Parents' names Parents' names

Study ID: A [redacted] Testing Laboratory: [redacted]  
 Sample IDs: Patient – 22W [redacted], Mum – 22W [redacted], Dad – 22W [redacted]

Reason for test Congenital diarrhoea

**About the test** We performed a 'trio whole genome sequencing' (trio WGS) test. This test examines your and Patient's genetic information to try and find a cause for Patient's condition. You can find links to more information about this test at the bottom of this document.

Patient's result **Microvillus inclusion disease**

Gene: *MYO5B*  
 Variant: NM\_000000: c.000C>G, p.Arg000Cys and c.000A>C, p.Glu000\*

**Inheritance and recurrence** **Inheritance pattern:** The two *MYO5B* gene variants in Patient have been inherited. Patient has inherited the c.000C>G, p.Arg000Cys from mum and the c.000A>C, p.Glu000\* from dad. Parents' names, you are both healthy 'carriers' for microvillus inclusion disease.

**Recurrence:** Parents' names, you have a 1 in 4, or 25%, chance of recurrence in each future pregnancy for the two of you. You have options for testing to avoid a recurrence and can discuss these in more detail with your genetics team.

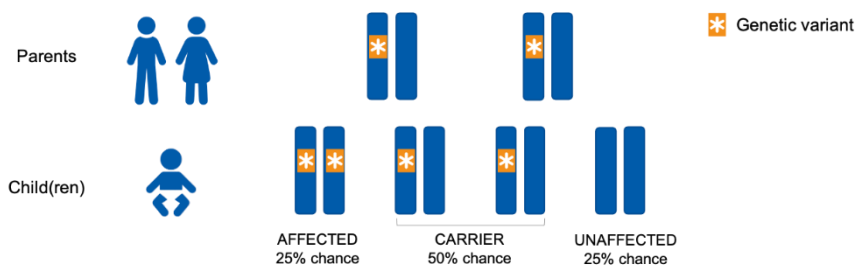

**What happens next** **Clinical recommendations:** You will be advised by the Gastroenterology team whether any changes to Patient's medication are necessary.

**Data storage and re-analysis:** Your and Patient's genomic data will be stored securely and can be re-analysed in the future if new clinical questions arise.

**Your genetic team** We will work together with the other medical teams involved in Patient's care.

**Clinical geneticist:**  
**Genetic counsellor:**  
**Genetics follow up:**

**Community supports** Further resources and community support networks:

- Genomics Info - [genomicsinfo.org.au](http://genomicsinfo.org.au)
- SWAN Australia - [swanaus.org.au](http://swanaus.org.au)
- Genetic Alliance Australia - [geneticalliance.org.au](http://geneticalliance.org.au)
- MedlinePlus Genetics - [medlineplus.gov/genetics](http://medlineplus.gov/genetics)

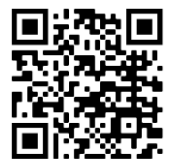

Scan the QR code for more information on genomics

|                                          |                                                                                                                                                                                                                                                                                                                                                                                                                                                                                                                                                                                                                                                                                                                                                                                                                                                                                                                                                                                                                                                                                                    |
|------------------------------------------|----------------------------------------------------------------------------------------------------------------------------------------------------------------------------------------------------------------------------------------------------------------------------------------------------------------------------------------------------------------------------------------------------------------------------------------------------------------------------------------------------------------------------------------------------------------------------------------------------------------------------------------------------------------------------------------------------------------------------------------------------------------------------------------------------------------------------------------------------------------------------------------------------------------------------------------------------------------------------------------------------------------------------------------------------------------------------------------------------|
| <p><b>Parents' names</b></p>             | <p><b>Parents' names</b></p> <p>Study ID: A [redacted]      Testing Laboratory: [redacted]</p> <p>Sample IDs: Patient – 22W [redacted], Mum – 22W [redacted], Dad – 22W [redacted]</p>                                                                                                                                                                                                                                                                                                                                                                                                                                                                                                                                                                                                                                                                                                                                                                                                                                                                                                             |
| <p><b>Reason for test</b></p>            | <p>Seizures and developmental delay</p>                                                                                                                                                                                                                                                                                                                                                                                                                                                                                                                                                                                                                                                                                                                                                                                                                                                                                                                                                                                                                                                            |
| <p><b>About the test</b></p>             | <p>We performed a 'trio whole genome sequencing' (trio WGS) test. This test examines your and Patient's genetic information to try and find a cause for Patient's condition. You can find links to more information about this test at the bottom of this document.</p>                                                                                                                                                                                                                                                                                                                                                                                                                                                                                                                                                                                                                                                                                                                                                                                                                            |
| <p><b>Patient's result</b></p>           | <p><b>Menke's disease</b></p> <p>Gene: <i>ATP7A</i></p> <p>Variant: NM_000000: c.000A&gt;C, p.Glu000*</p>                                                                                                                                                                                                                                                                                                                                                                                                                                                                                                                                                                                                                                                                                                                                                                                                                                                                                                                                                                                          |
| <p><b>Inheritance and recurrence</b></p> | <p><b>Inheritance pattern:</b> Mum, Patient has inherited the <i>ATP7A</i> gene variant from you. Mum, you are a healthy 'carrier' for Menke's disease, and other members of your family may also be carriers.</p> <p><b>Recurrence:</b> Parents' names, you have a 1 in 4, or 25%, chance of recurrence in each future pregnancy for the two of you. You have options for testing to avoid a recurrence and can discuss these in more detail with your genetics team.</p> 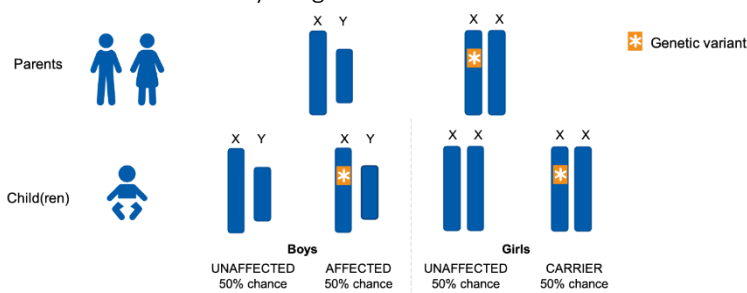 <p>The diagram illustrates the inheritance of the <i>ATP7A</i> gene variant. Parents: Mum is a carrier (X with variant, X without), Dad is unaffected (X without, Y). Child(ren): Boys have a 50% chance of being unaffected (X without, Y) and a 50% chance of being affected (X with variant, Y). Girls have a 50% chance of being unaffected (X without, X without) and a 50% chance of being a carrier (X with variant, X without). A legend indicates that an orange asterisk on a blue bar represents a genetic variant.</p> |
| <p><b>What happens next</b></p>          | <p><b>Clinical recommendations:</b> The Metabolic team will discuss management options with you.</p> <p><b>Data storage and re-analysis:</b> Your and Patient's genomic data will be stored securely and can be re-analysed in the future if new clinical questions arise.</p>                                                                                                                                                                                                                                                                                                                                                                                                                                                                                                                                                                                                                                                                                                                                                                                                                     |
| <p><b>Your genetic team</b></p>          | <p>We will work together with the other medical teams involved in Patient's care.</p> <p><b>Clinical geneticist:</b></p> <p><b>Genetic counsellor:</b></p> <p><b>Genetics follow up:</b></p>                                                                                                                                                                                                                                                                                                                                                                                                                                                                                                                                                                                                                                                                                                                                                                                                                                                                                                       |
| <p><b>Community supports</b></p>         | <p>Further resources and community support networks:</p> <ul style="list-style-type: none"> <li>• Genomics Info - <a href="http://genomicsinfo.org.au">genomicsinfo.org.au</a></li> <li>• SWAN Australia - <a href="http://swanaus.org.au">swanaus.org.au</a></li> <li>• Genetic Alliance Australia - <a href="http://geneticalliance.org.au">geneticalliance.org.au</a></li> <li>• MedlinePlus Genetics - <a href="http://medlineplus.gov/genetics">medlineplus.gov/genetics</a></li> </ul>  <p>Scan the QR code for more information on genomics</p>                                                                                                                                                                                                                                                                                                                                                                                                                                                        |

Parents' names Parents' names

Study ID: A [redacted] Testing Laboratory: [redacted]  
 Sample IDs: Patient – 22W [redacted], Mum – 22W [redacted], Dad – 22W [redacted]

Reason for test Seizures and developmental delay

About the test We performed a 'trio whole genome sequencing' (trio WGS) test. This test examines your and Patient's genetic information to try and find a cause for Patient's condition. You can find links to more information about this test at the bottom of this document.

Patient's result **Menke's disease**  
 Gene: *ATP7A*  
 Variant: NM\_000000: c.000A>C, p.Glu000\*

Inheritance and recurrence **Inheritance pattern:** Patient has not inherited the *ATP7A* gene variant, it has occurred in him/her for the first time (it is *de novo*).

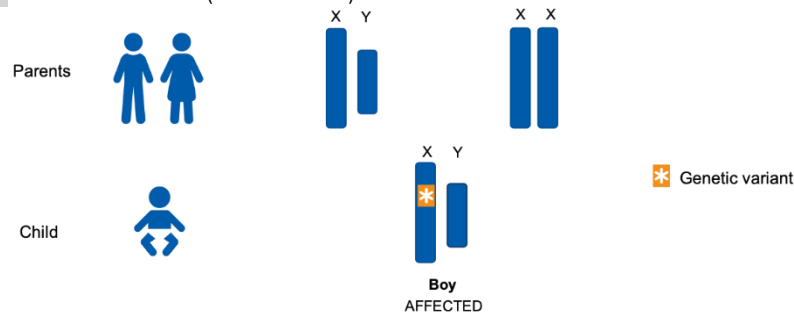

**Recurrence:** Parents' names, you have a low chance of recurrence in future pregnancies for this condition. You have options for testing to avoid a recurrence and can discuss these in more detail with your genetics team.

What happens next **Clinical recommendations:** The Metabolic team will discuss management options with you.  
**Data storage and re-analysis:** Your and Patient's genomic data will be stored securely and can be re-analysed in the future if new clinical questions arise.

Your genetic team We will work together with the other medical teams involved in Patient's care.  
 Clinical geneticist:  
 Genetic counsellor:  
 Genetics follow up:

Community supports Further resources and community support networks:

- Genomics Info - [genomicsinfo.org.au](http://genomicsinfo.org.au)
- SWAN Australia - [swanaus.org.au](http://swanaus.org.au)
- Genetic Alliance Australia - [geneticalliance.org.au](http://geneticalliance.org.au)
- MedlinePlus Genetics - [medlineplus.gov/genetics](http://medlineplus.gov/genetics)



Scan the QR code for more information on genomics

Parents' names Parents' names

Study ID: A [redacted] Testing Laboratory: [redacted]  
 Sample IDs: Patient – 22W [redacted], Mum – 22W [redacted], Dad – 22W [redacted]

Reason for test Suspected optic neuropathy

About the test We performed a 'trio whole genome sequencing' (trio WGS) test. This test examines your and Patient's genetic information to try and find a cause for Patient's condition. You can find links to more information about this test at the bottom of this document.

Patient's result Leber hereditary optic neuropathy

Gene: *MT-ND4*  
 Variant: NC\_000000: m.0000G>A, p.(Arg000His)

Inheritance and recurrence Inheritance pattern:

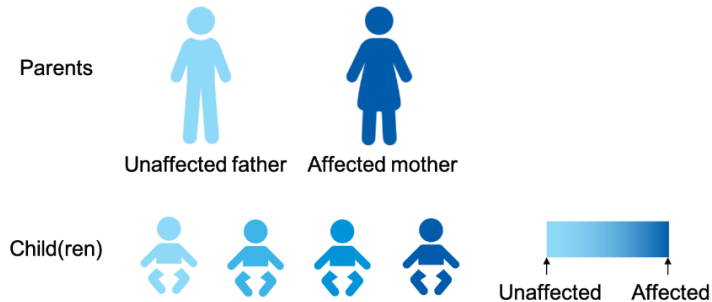

Recurrence:

What happens next **Clinical recommendations:** The Metabolic team will discuss management options with you.  
**Data storage and re-analysis:** Your and Patient's genomic data will be stored securely and can be re-analysed in the future if new clinical questions arise.

Your genetic team We will work together with the other medical teams involved in Patient's care.

Clinical geneticist:  
 Genetic counsellor:  
 Genetics follow up:

Community supports Further resources and community support networks:

- Genomics Info - [genomicsinfo.org.au](http://genomicsinfo.org.au)
  - SWAN Australia - [swanaus.org.au](http://swanaus.org.au)
  - Genetic Alliance Australia - [geneticalliance.org.au](http://geneticalliance.org.au)
- MedlinePlus Genetics - [medlineplus.gov/genetics](http://medlineplus.gov/genetics)

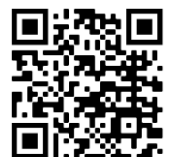

Scan the QR code for more information on genomics

|                                  |                                                                                                                                                                                                                                                                                                                                                                                                                                                                                              |
|----------------------------------|----------------------------------------------------------------------------------------------------------------------------------------------------------------------------------------------------------------------------------------------------------------------------------------------------------------------------------------------------------------------------------------------------------------------------------------------------------------------------------------------|
| <p><b>Parents' names</b></p>     | <p><b>Parents' names</b></p> <p>Study ID: A [redacted]      Testing Laboratory: [redacted]</p> <p>Sample IDs: Patient – 22W [redacted], Mum – 22W [redacted], Dad – 22W [redacted]</p>                                                                                                                                                                                                                                                                                                       |
| <p><b>Reason for test</b></p>    | <p>Hydrops</p>                                                                                                                                                                                                                                                                                                                                                                                                                                                                               |
| <p><b>About the test</b></p>     | <p>We performed a 'trio whole genome sequencing' (trio WGS) test. This test examines your and Patient's genetic information to try and find a cause for Patient's condition. You can find links to more information about this test at the bottom of this document.</p>                                                                                                                                                                                                                      |
| <p><b>Patient's result</b></p>   | <p><b>No genetic diagnosis was made</b></p> <p>However, two gene variants were identified that may be indicative of Nemaline myopathy 2. At the present time, we do not have enough evidence to be certain they are responsible for Patient's condition.</p> <p><b>Gene:</b> <i>NEB</i></p> <p><b>Variants:</b> NM_0000: c.000C&gt;G, p.Arg000Cys (variant of uncertain significance) and c.000C&gt;G, p.Arg000Cys (variant of uncertain significance)</p>                                   |
| <p><b>Inheritance</b></p>        | <p>The two <i>NEB</i> gene variants have been inherited from both of you. Patient has inherited the c.000C&gt;G, p.Arg000Cys from Mum and the c.000C&gt;G, p.Arg000Cys from Dad.</p>                                                                                                                                                                                                                                                                                                         |
| <p><b>What happens next</b></p>  | <p><b>Clinical recommendations:</b> <i>if applicable, can be deleted if not</i></p> <p><b>Data storage and re-analysis:</b> Your and Patient's genomic data will be stored securely and can be re-analysed in the future if new clinical questions arise.</p>                                                                                                                                                                                                                                |
| <p><b>Your genetic team</b></p>  | <p>We will work together with the other medical teams involved in Patient's care.</p> <p><b>Clinical geneticist:</b></p> <p><b>Genetic counsellor:</b></p> <p><b>Genetics follow up:</b></p>                                                                                                                                                                                                                                                                                                 |
| <p><b>Community supports</b></p> | <p>Further resources and community support networks:</p> <ul style="list-style-type: none"> <li>• Genomics Info - <a href="http://genomicsinfo.org.au">genomicsinfo.org.au</a></li> <li>• SWAN Australia - <a href="http://swanaus.org.au">swanaus.org.au</a></li> <li>• Genetic Alliance Australia - <a href="http://geneticalliance.org.au">geneticalliance.org.au</a></li> <li>• MedlinePlus Genetics - <a href="http://medlineplus.gov/genetics">medlineplus.gov/genetics</a></li> </ul> |

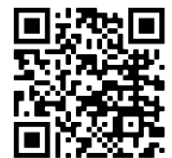

Scan the QR code for more information on genomics



Patient Name's Genomic Test Results

Family Report Issued: dd/mm/yyyy

|                                    |                                                                                                                                                                                                                                                                                                                                                                                                                                                                                              |
|------------------------------------|----------------------------------------------------------------------------------------------------------------------------------------------------------------------------------------------------------------------------------------------------------------------------------------------------------------------------------------------------------------------------------------------------------------------------------------------------------------------------------------------|
| <b>Parents' names</b>              | <p><b>Parents' names</b></p> <p>Study ID: A [redacted]      Testing Laboratory: [redacted]</p> <p>Sample IDs: Patient – 22W [redacted], Mum – 22W [redacted], Dad – 22W [redacted]</p>                                                                                                                                                                                                                                                                                                       |
| <b>Reason for test</b>             | Unexplained seizures in Patient                                                                                                                                                                                                                                                                                                                                                                                                                                                              |
| <b>About the test</b>              | We performed a 'trio whole genome sequencing' (trio WGS) test. This test examines your and Patient's genetic information to try and find a cause for Patient's condition. You can find links to more information about this test at the bottom of this document.                                                                                                                                                                                                                             |
| <b>Patient's result</b>            | <b>No genetic diagnosis was made</b>                                                                                                                                                                                                                                                                                                                                                                                                                                                         |
| <b>Possible reasons for result</b> | <ul style="list-style-type: none"> <li>• The cause of Patient's seizures may not be genetic</li> <li>• The cause of Patient's seizures may be genetic, but             <ul style="list-style-type: none"> <li>○ the particular gene change causing his/her seizures may be difficult to detect and interpret with current technology and knowledge</li> <li>○ may be due to a change in a gene that is yet to be linked to health problems</li> </ul> </li> </ul>                            |
| <b>What happens next</b>           | <p><b>Clinical recommendations:</b> <i>if applicable, can be deleted if not</i></p> <p><b>Data storage and re-analysis:</b> Your and Patient's genomic data will be stored securely and can be re-analysed in the future if new clinical questions arise.</p>                                                                                                                                                                                                                                |
| <b>Your genetic team</b>           | <p>We will work together with the other medical teams involved in Patient's care.</p> <p><b>Clinical geneticist:</b></p> <p><b>Genetic counsellor:</b></p> <p><b>Genetics follow up:</b></p>                                                                                                                                                                                                                                                                                                 |
| <b>Community supports</b>          | <p>Further resources and community support networks:</p> <ul style="list-style-type: none"> <li>• Genomics Info - <a href="http://genomicsinfo.org.au">genomicsinfo.org.au</a></li> <li>• SWAN Australia - <a href="http://swanaus.org.au">swanaus.org.au</a></li> <li>• Genetic Alliance Australia - <a href="http://geneticalliance.org.au">geneticalliance.org.au</a></li> <li>• MedlinePlus Genetics - <a href="http://medlineplus.gov/genetics">medlineplus.gov/genetics</a></li> </ul> |



Scan the QR code for more information on genomics

## Supplementary Notes 2. Family survey tool.

### Section 1: Demographics

This section asks questions about yourself. This can be used to help understand if certain trends in responses are linked to being in a particular group. This could be categorised by location, age, or what language you speak.

Note: as some demographic data could identify individual respondents in areas with few acute care units, we will combine data for some analyses.

#### 1) What is your gender? Please select one option.

- Male
  Female
  Other
  Prefer not to answer

a. If other, please specify.....

#### 2) What is your age? (years).....

#### 3) What is your home postcode?.....

#### 4) What is the highest level of education you have completed? Please select one.

- Year 11 or below / Certificate 3
  Bachelor degree
  Postgraduate degree  
 Year 12 or equivalent / Certificate 4
  Graduate degree
  Other (please specify).....

#### 5) What is the combined income of all adults (including you) in your household per year before tax? Please select one option.

- |                                              |                                              |                                              |                                                |                                               |
|----------------------------------------------|----------------------------------------------|----------------------------------------------|------------------------------------------------|-----------------------------------------------|
| <input type="checkbox"/> Less than \$4,900   | <input type="checkbox"/> \$20,000 - \$29,999 | <input type="checkbox"/> \$50,000 - \$59,999 | <input type="checkbox"/> \$80,000 - \$89,999   | <input type="checkbox"/> \$150,000 or more    |
| <input type="checkbox"/> \$5,000 - \$9,999   | <input type="checkbox"/> \$30,000 - \$39,999 | <input type="checkbox"/> \$60,000 - \$69,999 | <input type="checkbox"/> \$90,000 - \$119,999  | <input type="checkbox"/> Prefer not to answer |
| <input type="checkbox"/> \$10,000 - \$19,999 | <input type="checkbox"/> \$40,000 - \$49,999 | <input type="checkbox"/> \$70,000 - \$79,999 | <input type="checkbox"/> \$120,000 - \$149,999 |                                               |

#### 6) What is your current marital status?

- Married
  Divorced/separated
  Never married  
 De facto (living with a partner)
  Widowed
  Other (specify)

a) If other, please specify...

#### 7) How many children do you have?

- 0
  3
  6  
 1
  4
  >6  
 2
  5

a) How many of your children are 15 years or younger?

#### 8) Do you have private health insurance?

- Yes
  No
  Unsure

9) Is English the main language you use? *Please select one option.*

- Yes  No

a. If no, do you need assistance reading English?

- Yes  No

10) Do you plan on having more children? *Please select one option.*

- Yes in the next 2 years  Yes in more than 5 years  I am not currently planning to have more children
- Yes in the next 5 years  Yes but I'm not sure when  Unsure

## Section 2: Genomic Medicine and your Child's Family Report

We are gathering information about your experiences so far with genetic testing and genomic medicine. We will ask you to reflect and comment on your experiences with genomic testing, the layout of the family report, the information available on the family report, how you best understand information, and any recommendations you have to add to the report.

### EXPERIENCES WITH GENOMIC TESTING

11) Before the ultra-rapid genomic testing for your child, did you have any experience with genetic conditions, e.g. personal history, family history, general knowledge? *Please select one option.*

- Yes  No  Unsure

a. If yes or unsure, please describe, including the name of the genetic condition if you know it.....

12) Before the ultra-rapid genomic testing for your child, did you have any experience with genetic testing, whether through a GP, specialist, genetics clinic, or an online test, e.g., non-invasive prenatal screening/testing (NIPS/NIPT), carrier/reproductive screening, ancestry testing, etc.? *Please select one option.*

- Yes  No  Unsure

a. If yes or unsure, which genetic testing have you had experience with? *Please select all that apply.*

- |                                                                                                             |                                               |                                                                   |
|-------------------------------------------------------------------------------------------------------------|-----------------------------------------------|-------------------------------------------------------------------|
| <input type="checkbox"/> Non-invasive prenatal screening/testing (NIPS/NIPT) →<br><i>reveal question c.</i> | <input type="checkbox"/> Ancestry testing     | <input type="checkbox"/> Pharmacogenomic testing                  |
| <input type="checkbox"/> Carrier/reproductive screening →<br><i>reveal question c.</i>                      | <input type="checkbox"/> Nutrigenomic testing | <input type="checkbox"/> Other → <i>reveal question b. and c.</i> |

b. If other, please list...

c. Have you paid for any of these tests?

- Yes  No  Unsure

**13) Which of the following best describes the outcome of your child’s ultra-rapid genomic test?**

*Please select one option.*

- A genetic diagnosis was made       More than one genetic diagnosis was made       Not sure
- A partial genetic diagnosis was made (not all of my child’s features were explained by the genetic diagnosis)       A genetic diagnosis was not made

**14) Do you recall receiving a family report with the outcome of your child’s ultra-rapid genomic test? Please select one option.**

- Yes       No → *SURVEY STOP “This survey asks for feedback about the family report. Please contact [relevant Genetic Counsellor] for a copy of the report for your child’s ultra-rapid genomic test.”*       Unsure → *SURVEY STOP “This survey asks for feedback about the family report. Please contact [relevant Genetic Counsellor] for a copy of the report for your child’s ultra-rapid genomic test.”*

### LAYOUT OF THE FAMILY REPORT

**15) How easy was it to find the result of your child’s ultra-rapid genomic test in the family report?**

*Please select one option.*

- Not at all easy       Not so easy       Neutral       Easy       Very easy

**16) How helpful was the family report in understanding the result of your child’s ultra-rapid genomic test? Please select one option.**

- Not at all helpful       Not so helpful       OK       Helpful       Very helpful

**17) How satisfied were you with the general format (layout and style) of the family report? Please select one option.**

- Not at all satisfied       Not so satisfied       Neutral       Satisfied       Very satisfied

**18) How satisfied were you that the family report was structured in a logical manner? Please select one option.**

- Not at all satisfied       Not so satisfied       Neutral       Satisfied       Very satisfied

**19) How helpful were visual aids (e.g. pictures, bolded text, section headings, etc.) in helping you understand the information in the family report? Please select one option.**

- Not at all helpful       Not so helpful       OK       Helpful       Very helpful

**a. Please feel free to comment.....**

## INFORMATION AVAILABLE IN THE FAMILY REPORT

20) How easy is it to understand the language used in the family report? Please select one option.

- Not at all easy       Not so easy       Neutral       Easy       Very easy

21) Where medical terms are used in the family report, were they explained in a clear manner? Please select one option.

- Yes       No → reveal **question a.**       Unsure → reveal **question a.**  
 a. If no or unsure, please explain which terms weren't explained clearly and elaborate if you wish.....

22) Does the family report contain any unnecessary information? Please select one option.

- Yes → reveal **question a.**       No       Unsure → reveal **question a.**  
 a. If yes or unsure, please give examples of what information was unnecessary.....

[Q21 only for VUS or null result reports that include explanation of test limitations; piping from patient database:]

23) Did your family report explain any limitations of the test? Please select one option.

- Yes       No       Unsure

24) Did you find it helpful to have a list of which genetic health professionals (your genetic team) are involved in your child's care in the family report? Please select one option.

- Not at all helpful       Not so helpful       OK       Helpful       Very helpful

25) How easy was it to find sources of further information on the family report? Please select one option.

- Not at all easy       Not so easy       Neutral       Easy       Very easy  
 a. Please feel free to comment if there are other types of information you would find helpful.....

26) Using the information in the family report, if you were to have another child, what is the chance that the condition would occur again? Please select one option.

- Less than 1 in 100 (less than 1%)       Less than 1 in 10 (up to 10%)       1 in 4 (25%)       1 in 2 (50%)       3 in 4 (75%)       Definite (100%)

[Q25 will not appear for respondents who chose 'I'm not currently planning to have more children' in Q8:]

27) Using the information in the family report, do you feel you have enough information for future family planning? Please select one option.

- Yes       No       Unsure  
 a. If no or unsure, please explain.....

28) Using the information on the family report, would you/have you felt confident explaining the result of your child's ultra-rapid genomic test to someone else e.g. family or friends? *Please select one option.*

- Yes       No       Unsure

a. If no or unsure, please explain.....

29) Using the information in the family report, do you feel confident explaining to other family members whether or not they have a chance of being affected by the same condition as your child and/or having a child with the same condition? *Please select one option.*

- Yes       No       Unsure

a. If no or unsure, please explain.....

30) Who have you have shared this report with? *Please select all that apply and provide details of their relationship to you e.g. aunt, social worker. Please do **not** provide individual names or contact details.*

- Other Health Professionals       Friends       No one  
 Family       Other (specify)

a. If other, please specify.....

## HOW YOU BEST UNDERSTAND INFORMATION

31) When something is explained to you, is it easier to understand fractions (e.g., 'there's a 1 in 2 (1/2) chance that the coin will be heads') or percentages (e.g., 'there's a 50% chance that the coin will be heads')? *Please select one option.*

- Fractions       Percentages       No difference       Not sure

32) When reading or watching the news, how helpful do you find tables and graphs to explain parts of the story? *Please select one option.*

- Not at all helpful     Not so helpful     OK     Helpful     Very helpful

33) When you hear a weather forecast, do you prefer predictions using percentages (e.g., 'there will be a 20% chance of rain today') or predictions using only words (e.g., 'there is a small chance of rain today')? *Please select one option.*

- Percentages       Words       No difference       Not sure

34) Do you have any suggestions or comments about the family report that would help us improve it? .....

**Supplementary Notes 3. Clinician survey tool.**

**Section 1: About you**

**1. Where do you work? Please select all hospitals that apply.**

- ACT - The Canberra Hospital
- NSW - Children's Hospital Westmead
- NSW - John Hunter Children's Hospital
- NSW - Royal Prince Alfred
- NSW - Royal Hospital for Women Randwick
- NSW - Sydney Children's Hospital Randwick
- NSW - Westmead Hospital (adult)
- NT - The Royal Darwin Hospital
- QLD - Queensland Children's Hospital
- QLD - Royal Brisbane and Women's Hospital
- SA - Women's and Children's Hospital
- TAS - The Royal Hobart Hospital
- VIC - Royal Children's Hospital
- VIC - Monash Health
- VIC - Royal Women's Hospital
- WA - King Edward Memorial Hospital
- WA - Perth Children's Hospital
- Other

**a. If other, please specify:**

**2. What is your primary role? Please select one option.**

- Clinical Geneticist
- Clinical Genetics trainee
- Genetic Counsellor

**3. How many years of professional experience in clinical genetics do you have? Please select one option.**

- <5
- 6-10
- 11-15
- 16-20
- 21-25
- >25

**4. How many families have you seen as part of the Acute Care Genomics program from 2020 onwards? Please select one option.**

- 1-2
- 3-5
- 6-10
- >10

## Section 2: Your feedback on the plain language family report

This survey asks for feedback on the Acute Care Genomics plain language family report. See below for an example of the family report:

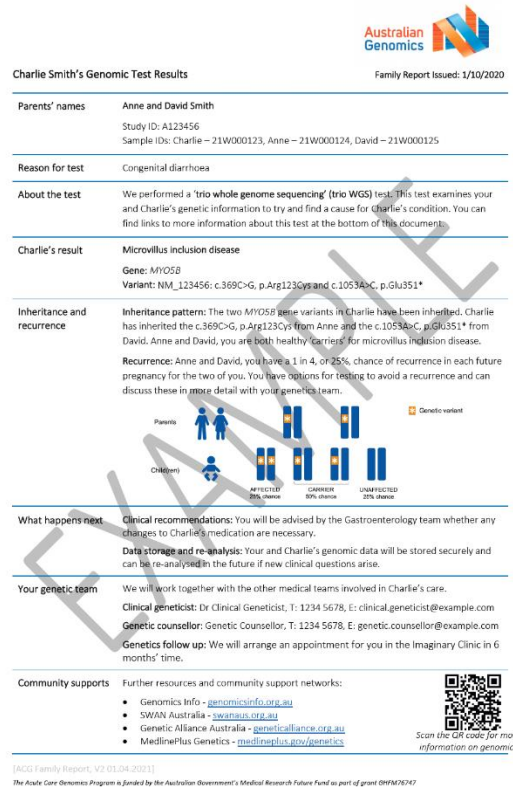

**Charlie Smith's Genomic Test Results** Family Report issued: 1/10/2020

**Parents' names:** Anne and David Smith  
Study ID: A123456  
Sample IDs: Charlie – 21W000123, Anne – 21W000124, David – 21W000125

**Reason for test:** Congenital diarrhoea

**About the test:** We performed a 'trio whole genome sequencing' (trio WGS) test. This test examines your and Charlie's genetic information to try and find a cause for Charlie's condition. You can find links to more information about this test at the bottom of this document.

**Charlie's result:** Microvillus inclusion disease  
Gene: MYO5B  
Variant: NM\_123456: c.369C>G, p.Arg123Cys and c.1053A>C, p.Glu351\*

**Inheritance and recurrence:** Inheritance pattern: The two MYO5B gene variants in Charlie have been inherited. Charlie has inherited the c.369C>G, p.Arg123Cys from Anne and the c.1053A>C, p.Glu351\* from David. Anne and David, you are both healthy 'carriers' for microvillus inclusion disease.  
Recurrence: Anne and David, you have a 1 in 4, or 25%, chance of recurrence in each future pregnancy for the two of you. You have options for testing to avoid a recurrence and can discuss these in more detail with your genetics team.

**What happens next:** Clinical recommendations: You will be advised by the Gastroenterology team whether any changes to Charlie's medication are necessary.  
Data storage and re-analysis: Your and Charlie's genomic data will be stored securely and can be re-analysed in the future if new clinical questions arise.

**Your genetic team:** We will work together with the other medical teams involved in Charlie's care.  
Clinical geneticist: Dr Clinical Geneticist, T: 1234 5678, E: clinical.geneticist@example.com  
Genetic counsellor: Genetic Counsellor, T: 1234 5678, E: genetic.counsellor@example.com  
Genetics follow up: We will arrange an appointment for you in the Imaginary Clinic in 6 months' time.

**Community supports:** Further resources and community support networks:  
• Genomics Info - [genomicsinfo.org.au](http://genomicsinfo.org.au)  
• SWAN Australia - [swanplus.org.au](http://swanplus.org.au)  
• Genetic Alliance Australia - [genetic-alliance.org.au](http://genetic-alliance.org.au)  
• MedlinePlus Genetics - [medlineplus.gov/genetics](http://medlineplus.gov/genetics)

ACG Family Report, V1 (10/04/2020)  
The Acute Care Genomics Program is funded by the Australian Government's Medical Research Future Fund as part of grant GPMR176747

## USE OF THE FAMILY REPORT

### 5. Have you used a family report with any families from the Acute Care Genomics program?

Please select one option.

- Yes  No → **EXIT:** Thank you for your interest in our study but this survey is only for health professionals who have used the family report.

### 6. How have you used the family report(s)? Please select all that apply.

- At the start of the result disclosure consultation, to guide the discussion
- During the result disclosure consultation, to help families' understanding and recollection
- At the end of the result disclosure consultation, to give families a written/visual record to take as a summary
- Other
- a. If other, please tell us more...

### 7. How helpful is the family report as part of the result disclosure process? Please select one option.

- Not at all helpful  Not so helpful  OK  Helpful  Very helpful

a. Please feel free to comment on the helpfulness of the family report...



**8. Have you distributed a family report to anyone else apart from the family?** E.g., Intensive care team

- Yes  No  Unsure

a. If yes, who did you distribute it to and why? ...

**9. Have you used the family report templates outside the Acute Care Genomics program?**

- Yes  No  Unsure

a. If yes, please tell us more...

## LAYOUT OF THE FAMILY REPORT

**10. How easy was it to find the result of the ultra-rapid genomic test in the family report?** *Please select one option.*

- Not at all easy  Not so easy  Neutral  Easy  Very easy

**11. How satisfied were you with the general format (layout and style) of the family report?** *Please select one option.*

- Not at all satisfied  Not so satisfied  Neutral  Satisfied  Very satisfied

**12. How satisfied were you that the family report was structured in a logical manner?** *Please select one option.*

- Not at all satisfied  Not so satisfied  Neutral  Satisfied  Very satisfied

**13. How helpful were visual aids (e.g., pictures, bolded text, section headings, etc.) as part of the result disclosure discussion?** *Please select one option.*

- Not at all helpful  Not so helpful  OK  Helpful  Very helpful

**14. Please feel free to comment on any aspect of the layout...**

## INFORMATION AVAILABLE IN THE FAMILY REPORT

**15. How easy do you think it is for families to understand the language used in the family report?** *Please select one option.*

- Not at all easy  Not so easy  Neutral  Easy  Very easy

**16. Where medical terms are used in the family report, do you think they are explained in a sufficiently clear manner for families?** *Please select one option.*

- Yes  No  Unsure

a. If no or unsure, please explain which terms aren't explained clearly and elaborate if you wish...

**17. Does the family report contain any unnecessary information for families?** *Please select one option.*

- Yes  No  Unsure

a. If yes or unsure, please give examples of what information was unnecessary.....

**18. Did you modify the family report beyond adding the details of the genetics team? E.g., community supports, clinical recommendations.**

- Yes  No  Unsure

**a. If yes, how easy was it to modify the family report?**

- Not at all easy  Not so easy  Neutral  Easy  Very easy

**b. What did you modify and why? ...**

## FINAL COMMENTS

**19. Please feel free to provide any other comments about the family report.** For example, any differences in how you used the report for informative or uninformative results.

**Supplementary Table 1. Demographics of family respondents.**

|                                                                                   |                     |
|-----------------------------------------------------------------------------------|---------------------|
| <b>Gender (n=51)</b>                                                              | <b>n (%)</b>        |
| female                                                                            | 40 (78)             |
| male                                                                              | 11 (22)             |
| <b>Age (n=49)</b>                                                                 | <b>mean (range)</b> |
| in years                                                                          | 34.9 (22-52)        |
| <b>Location (state/territory) (n=48)</b>                                          | <b>n (%)</b>        |
| Australian Capital Territory                                                      | 0 (0)               |
| New South Wales                                                                   | 15 (31)             |
| Northern Territory                                                                | 0 (0)               |
| Queensland                                                                        | 2 (4)               |
| South Australia                                                                   | 4 (8)               |
| Tasmania                                                                          | 1 (2)               |
| Victoria                                                                          | 24 (50)             |
| Western Australia                                                                 | 2 (4)               |
| <b>Highest level of education (n=50)</b>                                          | <b>n (%)</b>        |
| secondary                                                                         | 16 (32)             |
| post-secondary                                                                    | 34 (68)             |
| <b>Income (centiles) (n=49)</b>                                                   | <b>n (%)</b>        |
| 0-20% (< AU\$38,896)                                                              | 5 (10)              |
| 20-40% (AU\$38,897 to AU\$69,524)                                                 | 6 (12)              |
| 40-60% (AU\$69,525 to AU\$109,304)                                                | 11 (22)             |
| 60-80% (AU\$109,305 to AU \$168,688)                                              | 6 (12)              |
| 80-100% (>AU\$168,689)                                                            | 19 (39)             |
| prefer not to say / missing                                                       | 2 (4)               |
| <b>English as main language (n=51)</b>                                            | <b>n (%)</b>        |
| yes                                                                               | 44 (86)             |
| no                                                                                | 7 (17)              |
| <b>If English not main language – any assistance needed reading English (n=7)</b> | <b>n (%)</b>        |
| yes                                                                               | 0 (0)               |
| no                                                                                | 7 (100)             |
| <b>Planning more children (n=51)</b>                                              | <b>n (%)</b>        |
| Yes in the next 2 years                                                           | 8 (16)              |
| Yes in the next 5 years                                                           | 3 (6)               |
| Yes in more than 5 years                                                          | 0 (0)               |
| Yes but I'm not sure when                                                         | 9 (8)               |
| I am not currently planning to have more children                                 | 0 (0)               |
| Unsure                                                                            | 9 (18)              |

**Supplementary Table 2. Demographics of clinician respondents (n=57).**

| <b>Location (state/territory)</b>                            | <b>n (%)</b> |
|--------------------------------------------------------------|--------------|
| Australian Capital Territory                                 | 0 (0)        |
| New South Wales                                              | 18 (32)      |
| Northern Territory                                           | 0 (0)        |
| Queensland                                                   | 7 (12)       |
| South Australia                                              | 3 (5)        |
| Tasmania                                                     | 2 (4)        |
| Victoria                                                     | 23 (40)      |
| Western Australia                                            | 4 (7)        |
| <b>Years of professional experience in clinical genetics</b> | <b>n (%)</b> |
| <5                                                           | 22 (39)      |
| 6-10                                                         | 10 (18)      |
| 11-15                                                        | 15 (26)      |
| 16-20                                                        | 5 (9)        |
| 21-25                                                        | 3 (5)        |
| >25                                                          | 2 (4)        |
| <b>Number of families seen in ACG study</b>                  | <b>n (%)</b> |
| 1-2                                                          | 9 (16)       |
| 3-5                                                          | 15 (26)      |
| 6-10                                                         | 21 (37)      |
| > 10                                                         | 11 (19)      |
| prefer not to say / missing                                  | 1 (2)        |

**Supplementary Table 3. Means for family and clinician responses to five-point Likert scale questions regarding layout, content, and use of ‘family reports’.**

|                                                                                                                                                     | respondents | n  | mean | SD   |
|-----------------------------------------------------------------------------------------------------------------------------------------------------|-------------|----|------|------|
| <b>Layout of ‘family reports’</b>                                                                                                                   |             |    |      |      |
| How easy was it to find the result of your child's ultra-rapid genomic test in the family report?                                                   | family      | 40 | 4.33 | 0.62 |
| How satisfied were you with the general format (layout and style) of the family report?                                                             | family      | 40 | 4.18 | 0.64 |
| How satisfied were you that the family report was structured in a logical manner?                                                                   | family      | 39 | 4.26 | 0.59 |
| How helpful were visual aids (e.g., pictures, bolded text, section headings, etc.) in helping you understand the information in the family report?  | family      | 40 | 4.18 | 0.68 |
| How easy was it to find sources of further information on the family report?                                                                        | family      | 37 | 3.81 | 0.74 |
| How easy was it to find the result of the ultra-rapid genomic test in the family report?                                                            | clinician   | 53 | 4.57 | 0.50 |
| How satisfied were you with the general format (layout and style) of the family report?                                                             | clinician   | 53 | 4.60 | 0.49 |
| How satisfied were you that the family report was structured in a logical manner?                                                                   | clinician   | 52 | 4.60 | 0.50 |
| How helpful were visual aids (e.g., pictures, bolded text, section headings, etc.) as part of the result disclosure discussion?                     | clinician   | 53 | 4.40 | 0.82 |
| <b>Content of ‘family reports’</b>                                                                                                                  |             |    |      |      |
| How helpful was the family report in understanding the result of your child's ultra-rapid genomic test?                                             | family      | 39 | 3.97 | 0.74 |
| How easy is it to understand the language used in the family report?                                                                                | family      | 40 | 4.05 | 0.81 |
| How helpful was it to have a list of which genetic health professionals (your genetic team) are involved in your child's care in the family report? | family      | 39 | 4.18 | 0.76 |
| How easy do you think it is for families to understand the language used in the family report?                                                      | clinician   | 52 | 4.17 | 0.55 |
| <b>Use of ‘family reports’</b>                                                                                                                      |             |    |      |      |
| How easy was it to modify the family report?                                                                                                        | clinician   | 24 | 4.25 | 0.53 |
| How helpful is the family report as part of the result disclosure process?                                                                          | clinician   | 53 | 4.49 | 0.61 |

**Supplementary Table 4. Final survey questions mapped to constructs: personal characteristics of respondent, ‘family report’ layout, content, and use.** Survey question sources were: <sup>a</sup> Brett *et al.*, 2020 (questions used directly or modified); <sup>b</sup> study investigators (questions crafted by study investigator team); <sup>c</sup> Recchia *et al.*, 2020 (questions used directly or modified); <sup>d</sup> Nisselle *et al.*, 2019 (questions used directly or modified).

| Family survey | Clinician survey | Survey question                                                                                                                                                                                                                                                                                   | Source | Personal characteristics | Report layout | Report content | Report use |
|---------------|------------------|---------------------------------------------------------------------------------------------------------------------------------------------------------------------------------------------------------------------------------------------------------------------------------------------------|--------|--------------------------|---------------|----------------|------------|
| X             |                  | What gender are you?                                                                                                                                                                                                                                                                              | a      | X                        |               |                |            |
| X             |                  | What is your age? (years)                                                                                                                                                                                                                                                                         | a      | X                        |               |                |            |
| X             |                  | What is your home postcode?                                                                                                                                                                                                                                                                       | a      | X                        |               |                |            |
| X             |                  | What is the highest level of education you have completed?                                                                                                                                                                                                                                        | a      | X                        |               |                |            |
| X             |                  | What is the combined income of all adults (including you) in your household per year before tax?                                                                                                                                                                                                  | a      | X                        |               |                |            |
| X             |                  | What is your current marital status?                                                                                                                                                                                                                                                              | a      | X                        |               |                |            |
| X             |                  | How many children do you have?                                                                                                                                                                                                                                                                    | a      | X                        |               |                |            |
| X             |                  | Do you have private health insurance?                                                                                                                                                                                                                                                             | b      | X                        |               |                |            |
| X             |                  | Is English the main language you use?                                                                                                                                                                                                                                                             | b      | X                        |               |                |            |
| X             |                  | Do you plan on having more children?                                                                                                                                                                                                                                                              | b      | X                        |               |                |            |
| X             |                  | Before the ultra-rapid genomic testing for your child, did you have any experience with genetic conditions, e.g. personal history, family history, general knowledge?                                                                                                                             | b      | X                        |               |                |            |
| X             |                  | Before the ultra-rapid genomic testing for your child, did you have any experience with genetic testing, whether through a GP, specialist, genetics clinic, or an online test, e.g., non-invasive prenatal screening/testing (NIPS/NIPT), carrier/reproductive screening, ancestry testing, etc.? | b      | X                        |               |                |            |
| X             |                  | Which of the following best describes the outcome of your child’s ultra-rapid genomic test?                                                                                                                                                                                                       | c      | X                        |               |                |            |
|               | X                | Where do you work?                                                                                                                                                                                                                                                                                | d      | X                        |               |                |            |
|               | X                | What is your primary role?                                                                                                                                                                                                                                                                        | d      | X                        |               |                |            |
|               | X                | How many years of professional experience in clinical genetics do you have?                                                                                                                                                                                                                       | d      | X                        |               |                |            |

| Family survey | Clinician survey | Survey question                                                                                                                                   | Source | Personal characteristics | Report layout | Report content | Report use |
|---------------|------------------|---------------------------------------------------------------------------------------------------------------------------------------------------|--------|--------------------------|---------------|----------------|------------|
|               | X                | How many families have you seen as part of the Acute Care Genomics program from 2020 onwards?                                                     | b      | X                        |               |                |            |
| X             |                  | Do you recall receiving a family report with the outcome of your child's ultra-rapid genomic test?                                                | b      | X                        |               |                |            |
|               | X                | Have you used a family report with any families from the Acute Care Genomics program?                                                             | b      |                          |               |                | X          |
|               | X                | How have you used the family report(s)?                                                                                                           | b      |                          |               |                | X          |
|               | X                | How helpful is the family report as part of the result disclosure process?                                                                        | b      |                          |               |                | X          |
|               | X                | Have you distributed a family report to anyone else apart from the family?                                                                        | b      |                          |               |                | X          |
|               | X                | Have you used the family report templates outside the Acute Care Genomics program?                                                                | b      |                          |               |                | X          |
| X             | X                | How easy was it to find the result of [your child's/the] ultra-rapid genomic test in the family report?                                           | c      |                          | X             |                |            |
| X             |                  | How helpful was the family report in understanding the result of your child's ultra-rapid genomic test?                                           | c      |                          |               | X              |            |
| X             | X                | How satisfied were you with the general format (layout and style) of the family report?                                                           | c      |                          | X             |                |            |
| X             | X                | How satisfied were you that the family report was structured in a logical manner?                                                                 | c      |                          | X             |                |            |
| X             | X                | How helpful were visual aids (e.g. pictures, bolded text, section headings, etc.) in helping you understand the information in the family report? | b      |                          | X             |                |            |
| X             | X                | How easy [is it/do you think it is for families] to understand the language used in the family report?                                            | c      |                          |               | X              |            |
| X             | X                | Where medical terms are used in the family report, [were they/do you think they are] explained in a clear manner [for families]?                  | b      |                          |               | X              |            |

| Family survey | Clinician survey | Survey question                                                                                                                                                                                                                             | Source | Personal characteristics | Report layout | Report content | Report use |
|---------------|------------------|---------------------------------------------------------------------------------------------------------------------------------------------------------------------------------------------------------------------------------------------|--------|--------------------------|---------------|----------------|------------|
| X             | X                | Does the family report contain any unnecessary information?                                                                                                                                                                                 | b      |                          |               | X              |            |
| X             |                  | Did your family report explain any limitations of the test?                                                                                                                                                                                 | b      |                          |               | X              |            |
| X             |                  | Did you find it helpful to have a list of which genetic health professionals (your genetic team) are involved in your child's care in the family report?                                                                                    | b      |                          |               | X              |            |
| X             |                  | How easy was it to find sources of further information on the family report?                                                                                                                                                                | b      |                          | X             |                |            |
| X             |                  | Using the information in the family report, if you were to have another child how likely is it that the condition would occur again?                                                                                                        | c      |                          |               | X              | X          |
| X             |                  | Using the information in the family report, do you feel you have enough information for future family planning?                                                                                                                             | c      |                          |               | X              | X          |
| X             |                  | Using the information in the family report, would you/do you feel confident explaining the result of your child's ultra-rapid genomic test to someone else e.g. family or friends?                                                          | c      |                          |               | X              | X          |
| X             |                  | Using the information in the family report, do you feel confident explaining to other family members whether or not they have a chance of being affected by the same condition as your child and/or having a child with the same condition? | c      |                          |               | X              | X          |
| X             |                  | Who have you have shared this report with?                                                                                                                                                                                                  | b      |                          |               |                | X          |
|               | X                | Did you modify the family report beyond adding the details of the genetics team?                                                                                                                                                            | b      |                          |               |                | X          |
| X             |                  | When something is explained to you, is it easier to understand fractions (e.g., 'there's a 1 in 2 (1/2) chance that the coin will be heads') or percentages (e.g., 'there's a 50% chance that the coin will be heads')?                     | c      | X                        |               |                |            |
| X             |                  | When reading or watching the news, how helpful do you find tables and graphs to explain parts of the story?                                                                                                                                 | c      | X                        |               |                |            |



| Family survey | Clinician survey | Survey question                                                                                                                                                                                                   | Source | Personal characteristics | Report layout | Report content | Report use |
|---------------|------------------|-------------------------------------------------------------------------------------------------------------------------------------------------------------------------------------------------------------------|--------|--------------------------|---------------|----------------|------------|
| X             |                  | When you hear a weather forecast, do you prefer predictions using percentages (e.g., 'there will be a 20% chance of rain today') or predictions using only words (e.g., 'there is a small chance of rain today')? | c      | X                        |               |                |            |
| X             |                  | Do you have any suggestions or comments about the family report that would help us improve it?                                                                                                                    | c      |                          | X             | X              | X          |
|               | X                | Please feel free to provide any other comments about the family report.                                                                                                                                           | c      |                          | X             | X              | X          |
